# Supplementary material for: Resorcinol–formaldehyde based nanostructured carbons for CO2 adsorption: kinetics, isotherm and thermodynamic studies
Source: Royal Society of Chemistry journal article supplement (doi:10.1039/c5ra16255f), 2015-01-01
Supplement: c5ra16255f1.pdf [file c5ra16255f1.pdf]

## Electronic Supplementary Information

### Resorcinol-Formaldehyde Based Nanostructured Carbons for CO<sub>2</sub> Adsorption: Kinetics, Isotherm and Thermodynamic Studies

Chitракshi Goel, Haripada Bhunia, and Pramod K. Bajpai\*

chitракshigoel@yahoo.co.in, hbhuniar@thapar.edu, pkbajpai@thapar.edu

Department of Chemical Engineering, Thapar University, Patiala-147004, Punjab, India

\*Correspondence to: Pramod K. Bajpai

Email address: pkbajpai@thapar.edu

Phone: +91-175-2393438; fax: +91-175-2393005

#### Contents:

**Fig. S1** Pore size distribution of nanostructured carbons.

**Fig. S2** SEM image of (a) RF-500, (b) RF-600, (c, d) RF-700, (e) RF-800, and (f) RF-C.

**Fig. S3** Thermogravimetric profiles of the prepared carbons.

**Fig. S4** FTIR spectra of porous carbons obtained from RF resin.

**Fig. S5** Breakthrough profiles for RF-700 at (a) 7.5%, (b) 10%, and (c) 12.5% feed CO<sub>2</sub> concentration at different adsorption temperatures.

**Fig. S6** Comparison of kinetic models for CO<sub>2</sub> uptake on RF-700 at different adsorption temperatures (50 °C, 75 °C and 100 °C) as a function of feed concentration

**Fig. S7** Temperature programmed desorption profile of CO<sub>2</sub> of RF-700.

**Fig. S8** Arrhenius plot for kinetic rate constants obtained from fractional order kinetic model.

**Table S1** Deconvolution of C1s photoelectron envelope of RF-derived carbons

**Table S2** Deconvolution of O1s photoelectron envelope of RF-derived carbons

**Table S3** Kinetic model parameters for CO<sub>2</sub> adsorption on RF-700 at different adsorption temperatures and CO<sub>2</sub> concentrations

**Calculations of energy duty for desorption**

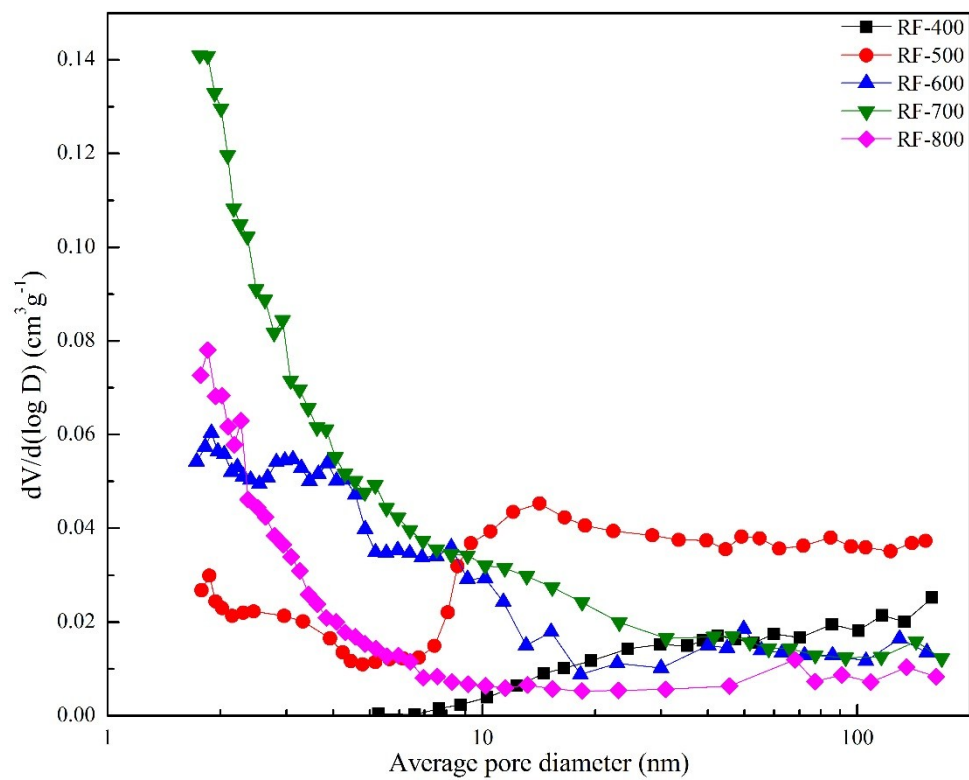

**Fig. S1** Pore size distribution of nanostructured carbons.

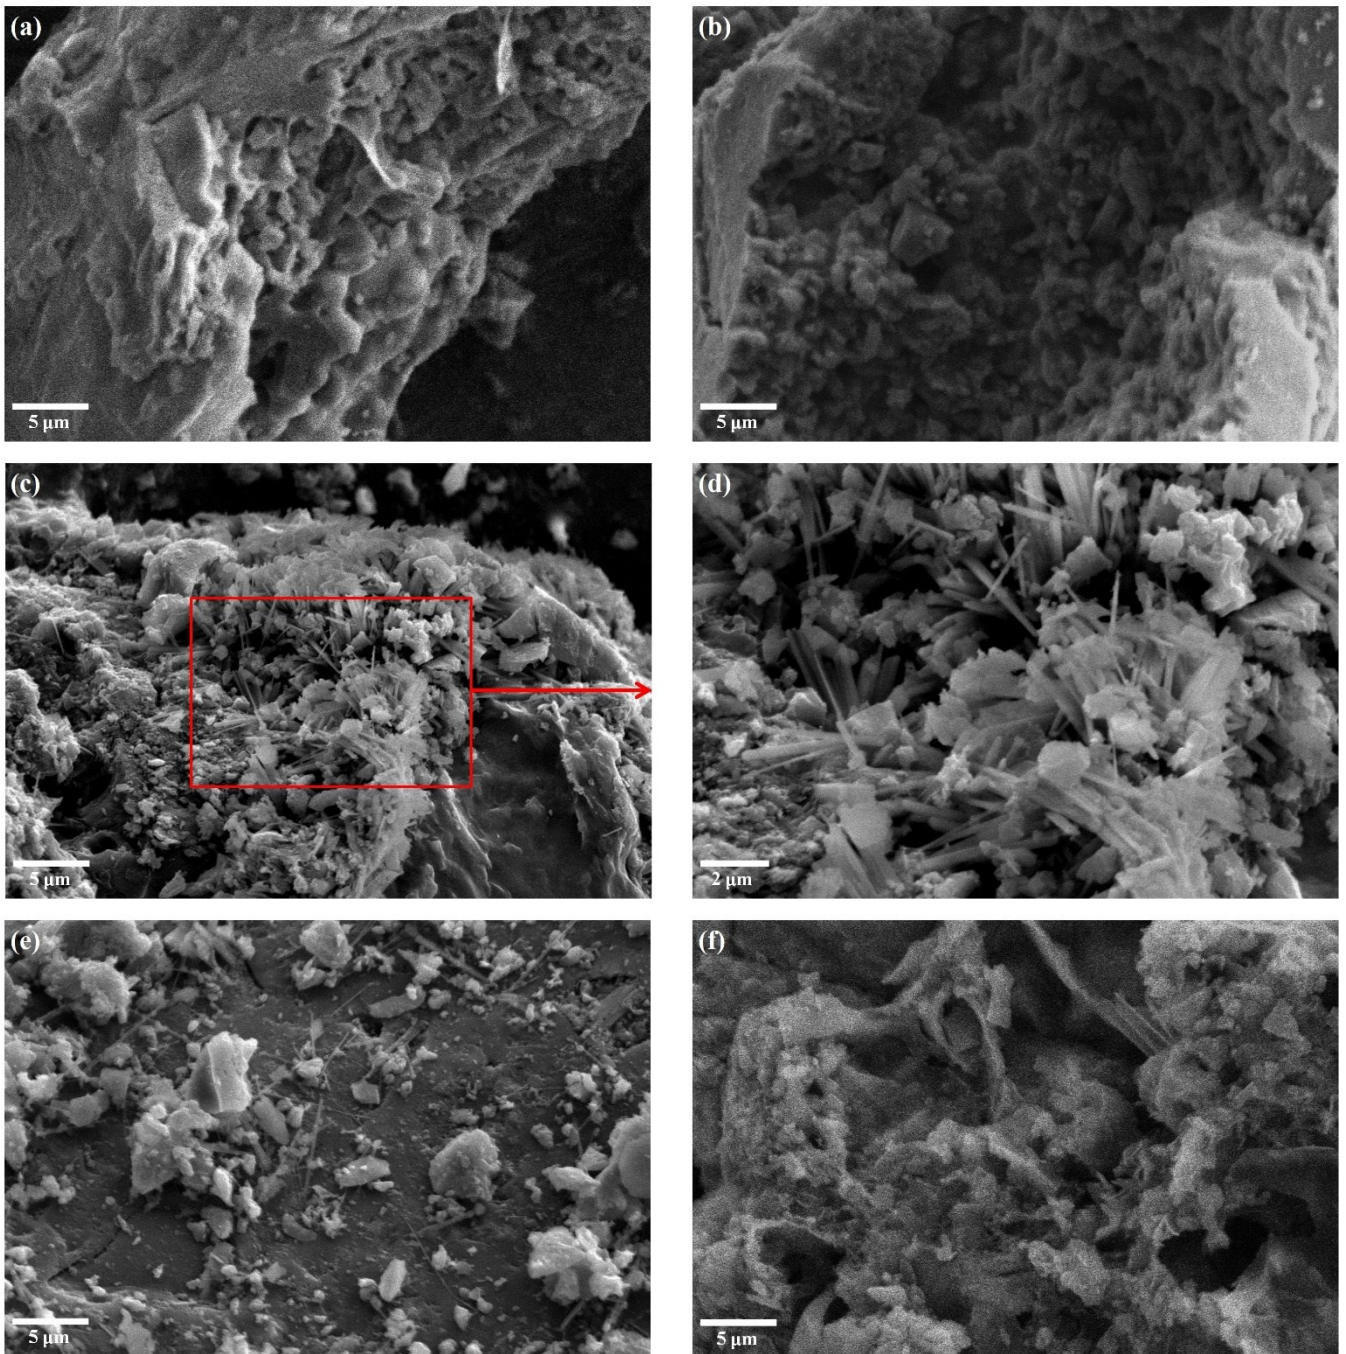

**Fig. S2** SEM image of (a) RF-500, (b) RF-600 (c, d) RF-700, (e) RF-800, and (f) RF-C.

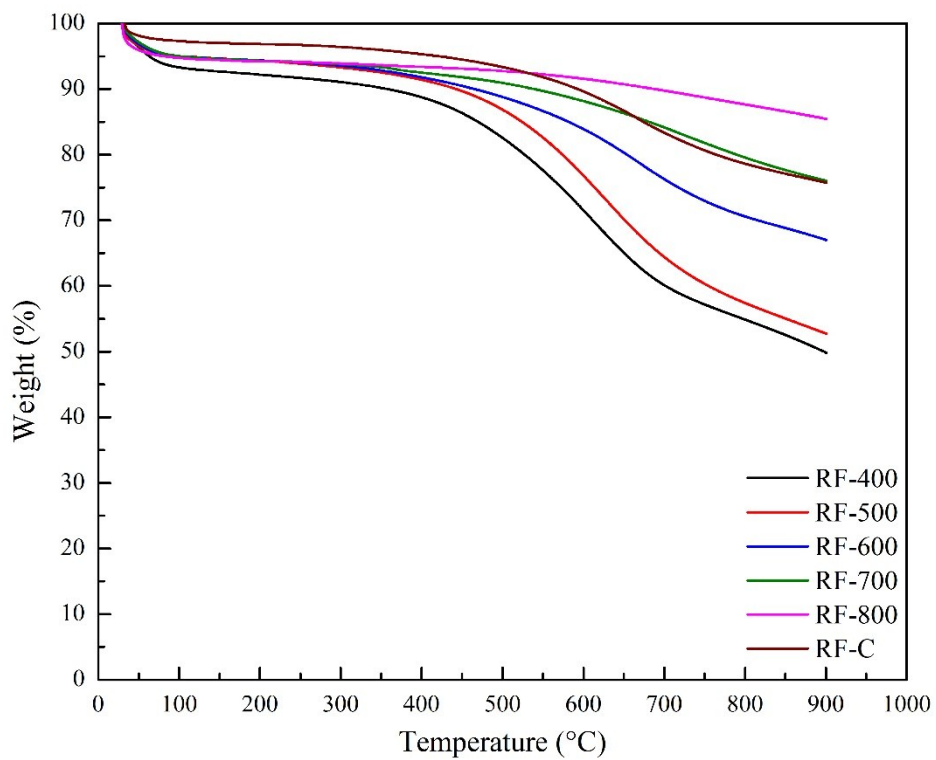

**Fig. S3** Thermogravimetric profiles of the prepared carbons.

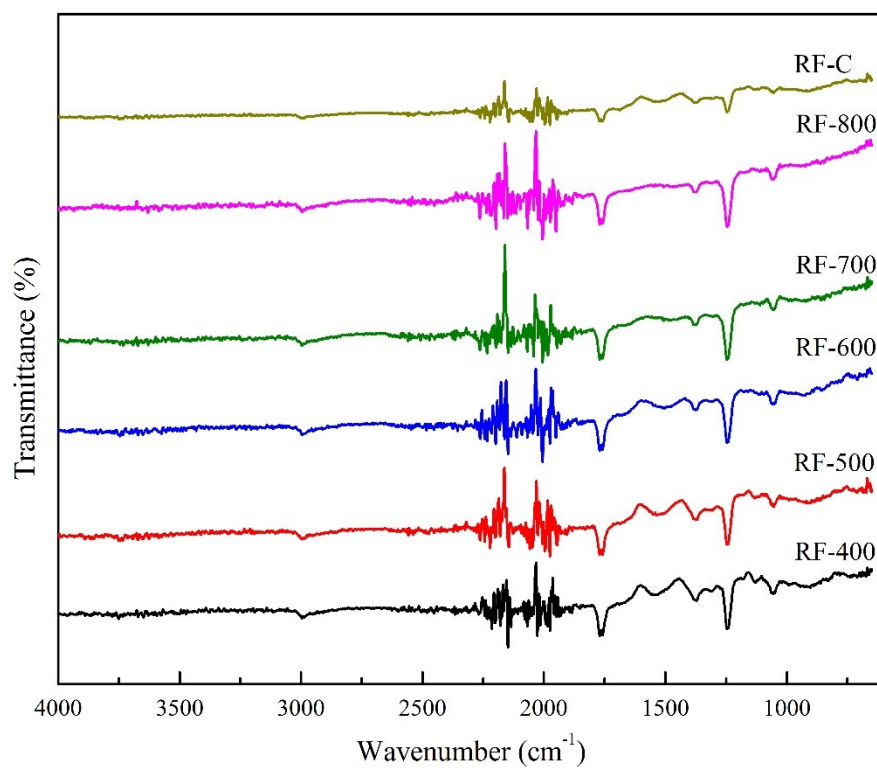

**Fig. S4** FTIR spectra of porous carbons obtained from RF resin.

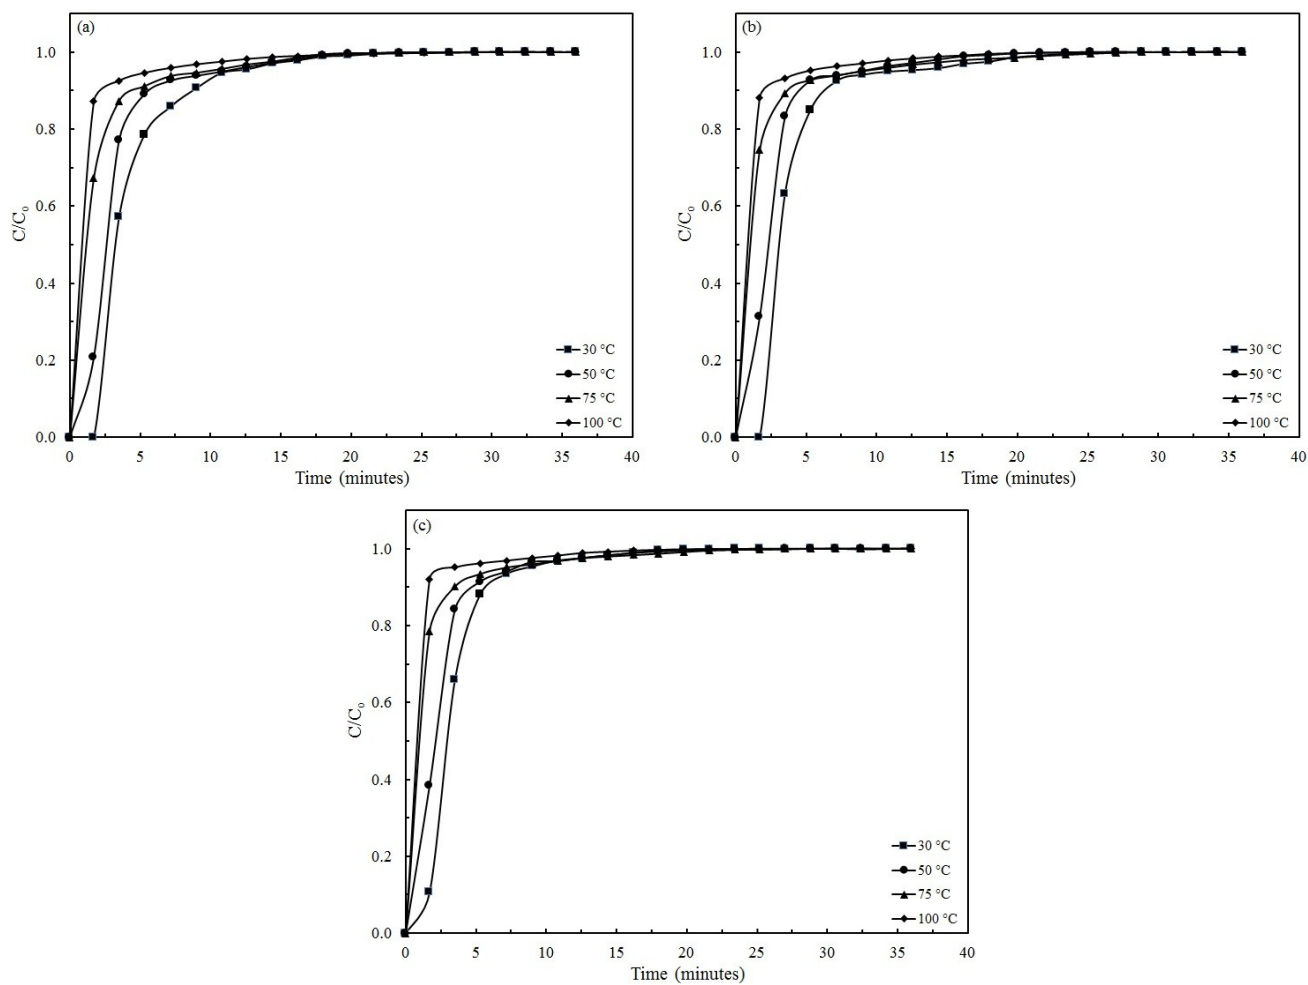

**Fig. S5** Breakthrough profiles for RF-700 at **(a)** 7.5%, **(b)** 10%, and **(c)** 12.5% feed CO<sub>2</sub> concentration at different adsorption temperatures.



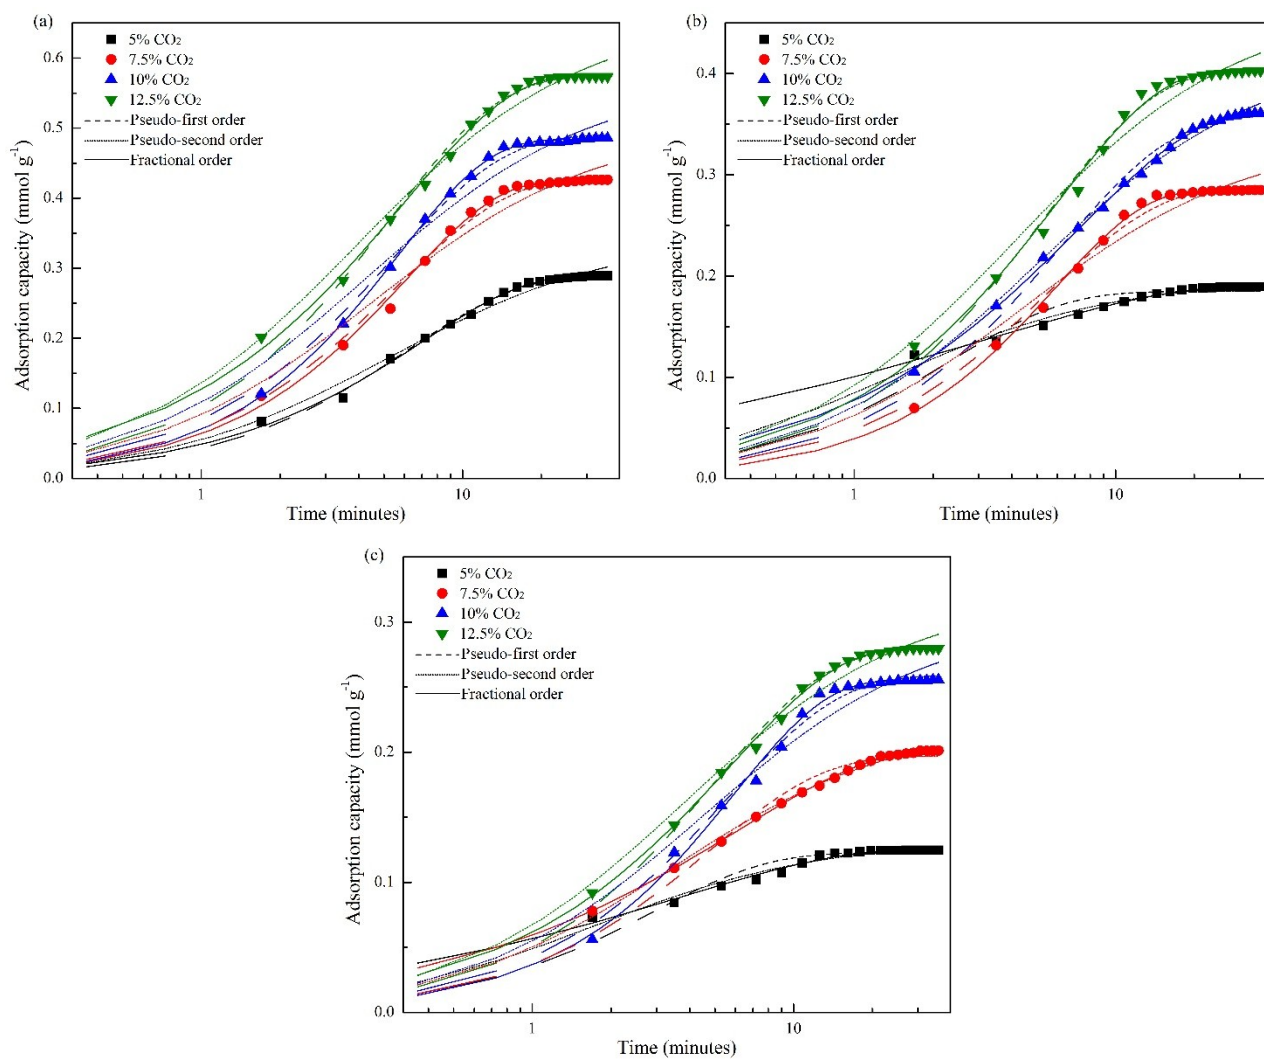

**Fig. S6** Comparison of kinetic models for CO<sub>2</sub> uptake on RF-700 at (a) 50 °C, (b) 75 °C, and (c) 100 °C as a function of feed concentration



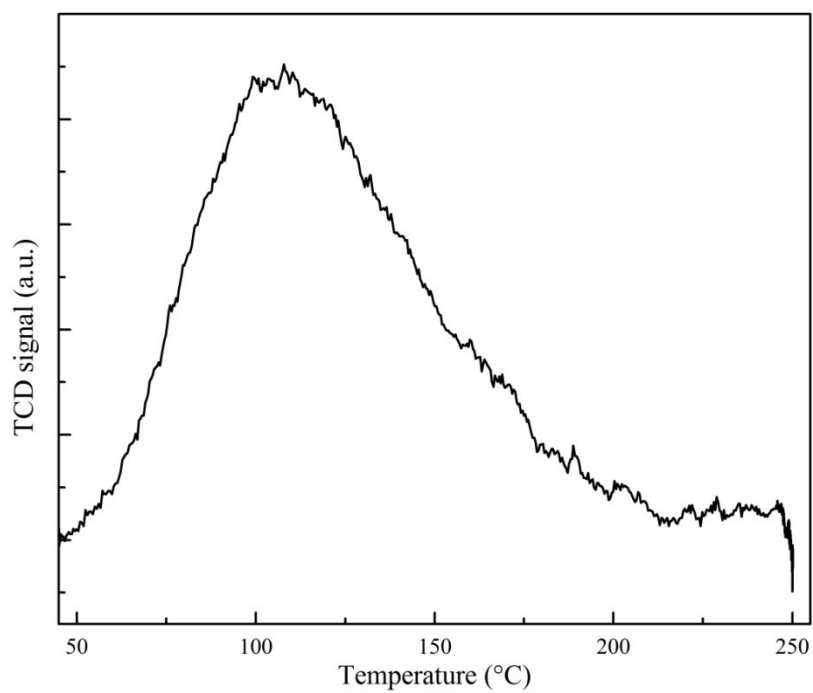

**Fig. S7** Temperature programmed desorption profile of CO<sub>2</sub> of RF-700.

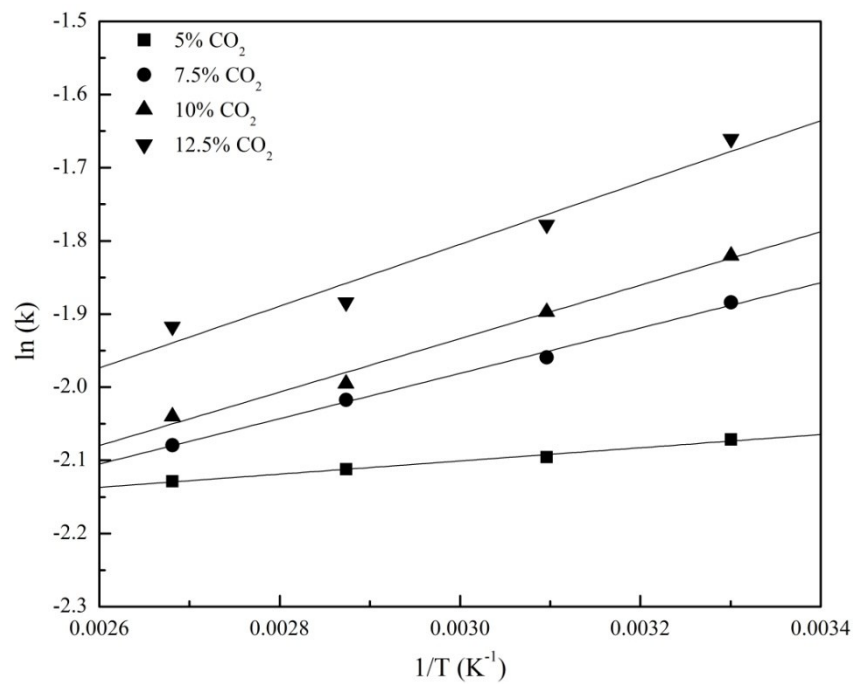

**Fig. S8** Arrhenius plot for kinetic rate constants obtained from fractional order kinetic model.

**Table S1** Deconvolution of C1s photoelectron envelope of RF-derived carbons

| Sample |      | C1     | C2     | C3     | C4     | C5     |
|--------|------|--------|--------|--------|--------|--------|
| RF-400 | BE   | 284.10 | 285.50 | 286.42 | 288.40 | -      |
|        | FWHM | 1.99   | 1.27   | 1.68   | 2.53   | -      |
|        | A %  | 60.08  | 25.22  | 13.83  | 0.88   | 0.00   |
| RF-500 | BE   | 284.55 | 285.27 | 286.30 | 288.70 | -      |
|        | FWHM | 1.29   | 1.09   | 1.45   | 2.11   | -      |
|        | A %  | 35.72  | 40.87  | 19.24  | 4.17   | 0.00   |
| RF-600 | BE   | 284.32 | 285.21 | 286.24 | 288.36 | -      |
|        | FWHM | 1.85   | 1.45   | 1.65   | 2.23   | -      |
|        | A %  | 54.69  | 22.32  | 15.44  | 7.55   | 0.00   |
| RF-700 | BE   | 284.25 | 285.14 | -      | 288.56 | -      |
|        | FWHM | 1.18   | 1.96   | -      | 4.3    | -      |
|        | A %  | 58.02  | 24.44  | 0.00   | 17.54  | 0.00   |
| RF-800 | BE   | 284.45 | 285.41 | -      | 288.18 | 283.44 |
|        | FWHM | 1.47   | 2.24   | -      | 2.24   | 1.29   |
|        | A %  | 17.71  | 14.67  | 0.00   | 8.35   | 59.27  |
| RF-C   | BE   | 284.42 | 285.13 | 286.43 | 288.31 | -      |
|        | FWHM | 0.86   | 0.94   | 1.48   | 1.90   | -      |
|        | A%   | 54.43  | 23.17  | 15.27  | 7.13   | 0.00   |

<sup>a</sup>BE: Binding energy (eV); FWHM: Full width at half maximum (eV); A%: relative area percentage

**Table S2** Deconvolution of O1s photoelectron envelope of RF-derived carbons

| Sample |      | O1     | O2     | O3     |
|--------|------|--------|--------|--------|
| RF-400 | BE   | 531.81 | 532.80 | 533.46 |
|        | FWHM | 1.73   | 1.38   | 1.69   |
|        | A %  | 31.25  | 40.68  | 28.07  |
| RF-500 | BE   | 531.21 | 532.23 | 533.24 |
|        | FWHM | 2.36   | 1.34   | 1.41   |
|        | A %  | 57.06  | 26.02  | 16.92  |
| RF-600 | BE   | 531.67 | 532.38 | 533.21 |
|        | FWHM | 1.57   | 1.33   | 1.43   |
|        | A %  | 34.34  | 39.15  | 26.51  |
| RF-700 | BE   | 531.35 | 532.16 | 533.11 |
|        | FWHM | 1.80   | 1.35   | 1.84   |
|        | A %  | 26.58  | 36.10  | 37.32  |
| RF-800 | BE   | 531.22 | 532.11 | -      |
|        | FWHM | 1.54   | 1.10   | -      |
|        | A %  | 80.55  | 19.45  | 0.00   |
| RF-C   | BE   | 531.67 | 532.29 | 533.60 |
|        | FWHM | 1.45   | 1.54   | 1.66   |
|        | A%   | 39.93  | 33.29  | 26.79  |

<sup>a</sup>BE: Binding energy (eV); FWHM: Full width at half maximum (eV); A%: relative area percentage

**Table S3** Kinetic model parameters for CO<sub>2</sub> adsorption on RF-700 at different adsorption temperatures and CO<sub>2</sub> concentrations

| Adsorption temperature (°C) | CO <sub>2</sub> concentration (volume%) | Pseudo-first order model            |                                        |                |         | Pseudo-second order model                                |                                         |                |         | Fractional order model                                                   |                                        |       |       |                |         |
|-----------------------------|-----------------------------------------|-------------------------------------|----------------------------------------|----------------|---------|----------------------------------------------------------|-----------------------------------------|----------------|---------|--------------------------------------------------------------------------|----------------------------------------|-------|-------|----------------|---------|
|                             |                                         | k <sub>1</sub> (min <sup>-1</sup> ) | q <sub>e</sub> (mmol g <sup>-1</sup> ) | R <sup>2</sup> | Error % | k <sub>2</sub> (g mmol <sup>-1</sup> min <sup>-1</sup> ) | q <sub>e</sub> (mmo l g <sup>-1</sup> ) | R <sup>2</sup> | Error % | k <sub>n</sub> (mmol <sup>1-n</sup> g <sup>m-1</sup> min <sup>-n</sup> ) | q <sub>e</sub> (mmol g <sup>-1</sup> ) | n     | m     | R <sup>2</sup> | Error % |
| 30                          | 5                                       | 0.160                               | 0.410                                  | 0.993          | 4.458   | 0.378                                                    | 0.489                                   | 0.974          | 9.014   | 0.126                                                                    | 0.402                                  | 0.898 | 1.020 | 0.997          | 4.207   |
|                             | 7.5                                     | 0.147                               | 0.574                                  | 0.998          | 1.991   | 0.242                                                    | 0.690                                   | 0.993          | 5.569   | 0.152                                                                    | 0.578                                  | 1.009 | 1.036 | 0.999          | 1.682   |
|                             | 10                                      | 0.190                               | 0.712                                  | 0.996          | 2.854   | 0.289                                                    | 0.826                                   | 0.974          | 8.303   | 0.162                                                                    | 0.703                                  | 1.106 | 1.048 | 0.999          | 2.200   |
|                             | 12.5                                    | 0.192                               | 0.764                                  | 0.993          | 5.435   | 0.269                                                    | 0.887                                   | 0.973          | 11.128  | 0.190                                                                    | 0.763                                  | 1.326 | 1.353 | 0.996          | 3.710   |
| 50                          | 5                                       | 0.160                               | 0.292                                  | 0.997          | 3.960   | 0.549                                                    | 0.346                                   | 0.987          | 5.430   | 0.123                                                                    | 0.289                                  | 0.754 | 0.871 | 0.998          | 3.140   |
|                             | 7.5                                     | 0.179                               | 0.432                                  | 0.995          | 3.649   | 0.437                                                    | 0.504                                   | 0.975          | 7.082   | 0.141                                                                    | 0.426                                  | 0.838 | 1.020 | 0.997          | 3.268   |
|                             | 10                                      | 0.189                               | 0.491                                  | 0.996          | 3.435   | 0.411                                                    | 0.570                                   | 0.973          | 9.654   | 0.150                                                                    | 0.484                                  | 0.863 | 1.076 | 0.999          | 0.951   |
|                             | 12.5                                    | 0.195                               | 0.577                                  | 0.995          | 4.585   | 0.389                                                    | 0.662                                   | 0.987          | 3.835   | 0.169                                                                    | 0.576                                  | 0.862 | 1.097 | 0.998          | 2.272   |
| 75                          | 5                                       | 0.424                               | 0.185                                  | 0.955          | 6.551   | 3.761                                                    | 0.198                                   | 0.992          | 2.923   | 0.121                                                                    | 0.190                                  | 0.590 | 0.370 | 0.998          | 1.450   |
|                             | 7.5                                     | 0.183                               | 0.290                                  | 0.994          | 3.694   | 0.665                                                    | 0.338                                   | 0.969          | 9.741   | 0.133                                                                    | 0.285                                  | 0.762 | 0.693 | 0.998          | 1.931   |

|     |      |       |       |       |       |       |       |       |        |       |       |       |       |       |       |
|-----|------|-------|-------|-------|-------|-------|-------|-------|--------|-------|-------|-------|-------|-------|-------|
|     | 10   | 0.164 | 0.359 | 0.994 | 4.719 | 0.478 | 0.422 | 0.997 | 1.620  | 0.136 | 0.363 | 0.770 | 0.739 | 0.999 | 1.297 |
|     | 12.5 | 0.188 | 0.406 | 0.994 | 4.132 | 0.519 | 0.468 | 0.981 | 4.654  | 0.152 | 0.403 | 0.793 | 0.875 | 0.996 | 3.013 |
| 100 | 5    | 0.342 | 0.123 | 0.960 | 6.981 | 4.377 | 0.133 | 0.989 | 3.350  | 0.119 | 0.125 | 0.655 | 0.467 | 0.995 | 2.124 |
|     | 7.5  | 0.208 | 0.197 | 0.984 | 6.393 | 1.277 | 0.224 | 0.995 | 1.752  | 0.125 | 0.202 | 0.703 | 0.607 | 0.999 | 0.546 |
|     | 10   | 0.180 | 0.259 | 0.993 | 5.583 | 0.729 | 0.303 | 0.971 | 11.862 | 0.130 | 0.255 | 0.748 | 1.052 | 0.996 | 3.107 |
|     | 12.5 | 0.200 | 0.280 | 0.997 | 3.222 | 0.822 | 0.321 | 0.989 | 3.773  | 0.147 | 0.280 | 0.775 | 1.114 | 0.999 | 1.262 |

## Calculations of energy duty for desorption

### 1. Sensible heat

*Adsorption conditions:*

Adsorption temperature: 30 °C

Feed gas concentration: 12.5% CO<sub>2</sub> in N<sub>2</sub>

Pressure: 1 atm

*Desorption conditions:*

Desorption temperature: 200 °C

Purge gas: 100% N<sub>2</sub>

Temperature difference,  $\Delta T = (200 - 30) \text{ °C} = 170 \text{ °C} = 170 \text{ K}$

Specific heat capacity of the prepared carbon (RF-700),  $C_p = 1.215 \text{ J g}^{-1} \text{ K}^{-1}$

CO<sub>2</sub> adsorption capacity of RF-700 = 0.76 mmol CO<sub>2</sub> per g adsorbent

$$= 0.76 \times 10^{-3} \text{ mol CO}_2 \text{ per g adsorbent}$$

$$\begin{aligned} \text{Sensible heat} &= \frac{C_p \Delta T}{\text{adsorption capacity}} \\ &= \frac{1.215 \times 170}{0.76 \times 10^{-3}} \text{ J per mole CO}_2 \\ &= 271,776.3 \text{ J per mole CO}_2 \end{aligned}$$

$$\text{Sensible heat} = 271.8 \text{ kJ per mole CO}_2$$

Assuming that 75% of the sensible heat required for heating the adsorbent material can be recovered using indirect or direct in a heat exchange,

Net sensible heat required in the process = (25% of 271.8) kJ per mole CO<sub>2</sub>

$$\text{Sensible heat} = 67.9 \text{ kJ per mole CO}_2$$

### 2. Isotheric heat of adsorption

Isotheric heat of adsorption was obtained from CO<sub>2</sub> adsorption isotherms by using Clausius-Clapeyron equation.

$$\text{Isotheric heat of adsorption, } Q_{st} = 15.74 \text{ kJ per mole CO}_2$$



### 3. Thermal energy input

$$\begin{aligned} \text{Thermal energy input} &= \text{Desorption heat} + \text{Sensible heat} \\ &= (15.74 + 67.9) \text{ kJ per mole } CO_2 \end{aligned}$$

$$\text{Thermal energy input} = 83.64 \text{ kJ per mole } CO_2$$

$$\begin{aligned} &\frac{83.64}{44} \text{ kJ per g } CO_2 \\ &= 1.9 \text{ kJ per g } CO_2 = 1.9 \text{ MJ per kg } CO_2 \end{aligned}$$

Hence desorption of 1 kg  $CO_2$  requires energy equal to 1.9 MJ which is obtained from the burning of fossil fuels.

### 4. $CO_2$ generated

Assuming fuel used for energy production is Bituminous coal.

$CO_2$  generated from burning of Bituminous coal = 205.3 lbs per Million Btu

$$\begin{aligned} CO_2 \text{ generated} &= \frac{205.3 \times 0.454}{1.055 \times 10^9} \text{ kg } CO_2 \text{ per J} \\ &= 8.84 \times 10^{-8} \text{ kg } CO_2 \text{ per J} \\ &= 0.0884 \text{ kg } CO_2 \text{ per MJ} \end{aligned}$$

i.e. to generate 1 MJ of energy from burning of bituminous coal 0.0884 kg of  $CO_2$  is generated.

$$\begin{aligned} CO_2 \text{ adsorption capacity} &= 0.76 \text{ mmol } CO_2 \text{ per g adsorbent} \\ &= 0.76 \text{ mol } CO_2 \text{ per kg adsorbent} \\ &= (0.76 \times 44) \text{ g } CO_2 \text{ per kg adsorbent} \\ &= 33.44 \text{ g } CO_2 \text{ per kg adsorbent} \\ &= 0.03344 \text{ kg } CO_2 \text{ per kg adsorbent} \end{aligned}$$

#### **Basis: 1 kg adsorbent**

$$CO_2 \text{ adsorbed} = 0.03344 \text{ kg } CO_2 \text{ per kg adsorbent}$$

$$\text{Energy required to desorb } 0.03344 \text{ kg } CO_2 = (1.9 \times 0.03344) \text{ MJ} = 0.064 \text{ MJ}$$

$$\text{Hence } CO_2 \text{ generated from combustion of fossil fuel} = (0.0884 \times 0.064) \text{ kg } CO_2$$

$$CO_2 \text{ generated} = 0.0056 \text{ kg } CO_2$$

Therefore, energy required for desorption of 0.03344 kg CO<sub>2</sub> per kg adsorbent is equivalent to the generation of 0.0056 kg of CO<sub>2</sub> per kg adsorbent.
